# Supplementary material
Source: PubMed Central journal article supplement (PMC6939600)
Supplement: supp_RA119000254_154251_2_supp_420062_q04qs2.pdf [file supp_RA119000254_154251_2_supp_420062_q04qs2.pdf]

# Supplemental Table S1

| Target Gene | Direction | Sequence (5' - 3')            |
|-------------|-----------|-------------------------------|
| β-actin     | F         | AGA GCT ACG AGC TGC CTG AC    |
|             | R         | AGC ACT GTG TTG GCG TAC AG    |
| SGPL1       | F         | CAG CTA ATT GCA TGG AGT GTC G |
|             | R         | CCT TGA CCA TAA ACT CTC TGG C |
| Keratin 5   | F         | CCA AGG TTG ATG CAC TGA TGG   |
|             | R         | TGT CAG AGA CAT GCG TCT GC    |
| Keratin 14  | F         | TGG ACG TGA AGA CGC GGC TGG   |
|             | R         | GAT TTG GCG GCT GGA GGA GGT C |
| Keratin 16  | F         | TGC CCA CCT TTC CTC CCA GCA A |
|             | R         | CCG GGT CTG ACG GCT CGA AG    |
| PCNA        | F         | CGA CAC CTA CCG CTG CGA CC    |
|             | R         | TAG CGC CAA GGT ATC CGC GT    |
| CDKN1A      | F         | TCA GGG TCG AAA ACG GCG GC    |
|             | R         | TTT GAG GCC CTC GCG CTT CC    |
| CDKN1B      | F         | AGC GGA GCA ATG CGC AGG AA    |
|             | R         | GGC GTC TGC TCC ACA GAA CCG   |

# Supplemental Figure S1

**A**

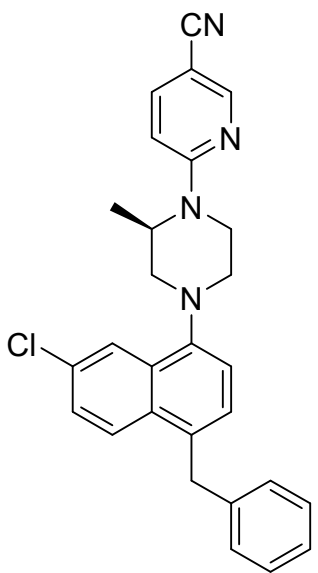

(R)-6-(4-(4-benzyl-7-chloronaphthalen-1-yl)-2-methylpiperazin-1-yl)nicotinonitrile

**B**

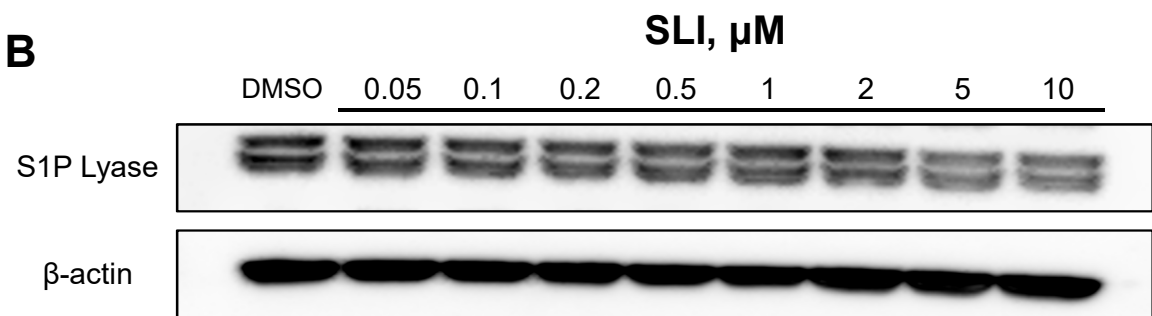

**Supplemental Figure S1. SLI induces inhibition of S1P lyase in HEK cells.** (A) Structure of SLI. (B) HEK cell lysates prepared after treatment with SLI at various concentrations for 48 h were subjected to western blot for S1P lyase.

# Supplemental Figure S2

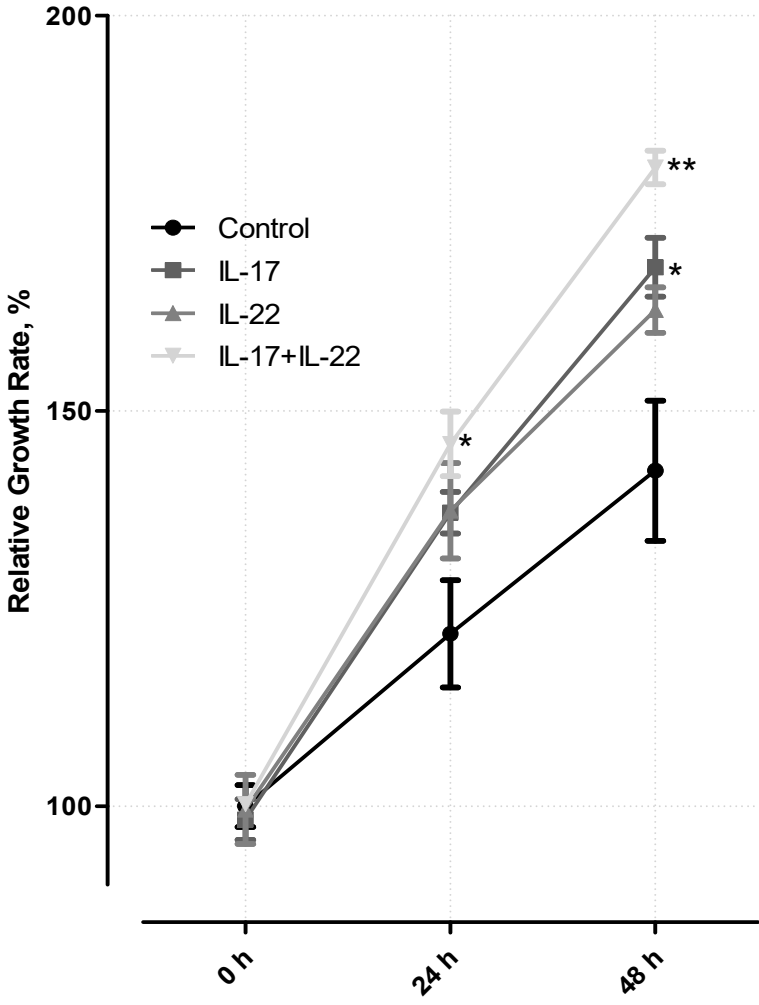

Supplemental Figure S2. Interleukins induces hyperproliferative HEK293 cells. HEK293 cells treated with IL-17, IL-22 or co-treatment proliferation rates for 24 h and 48 h, as measured by XTT assay. Data are presented as the mean  $\pm$  SEM, \*p < 0.05, \*\*p < 0.01, vs the control, n=3.

# Supplemental Figure S3

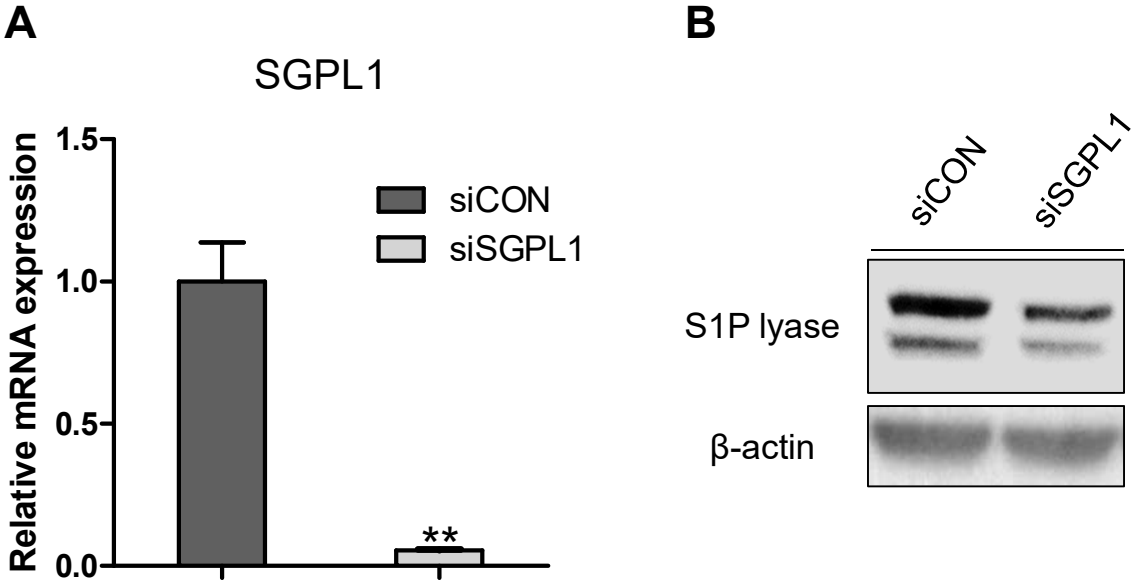

**Supplemental Figure S3. S1P lyase downregulation by siRNA transfection.** (A) HEK293 cells grown in growth supplement medium were transfected with siCON or siSGPL1 at 10 nM. 48 h after the siRNA transfection, real-time PCR was analyzed to determine the mRNA level of SGPL1 in HEK293 cells. Amount of mRNA was normalized by  $\beta$ -actin. Data are presented as the mean  $\pm$  SEM, \*\* $p < 0.01$ , vs the control,  $n=3$ . (B) Western blotting was performed with cell lysates. Protein expression of S1P lyase.  $\beta$ -actin was used as the control.

# Supplemental Figure S4

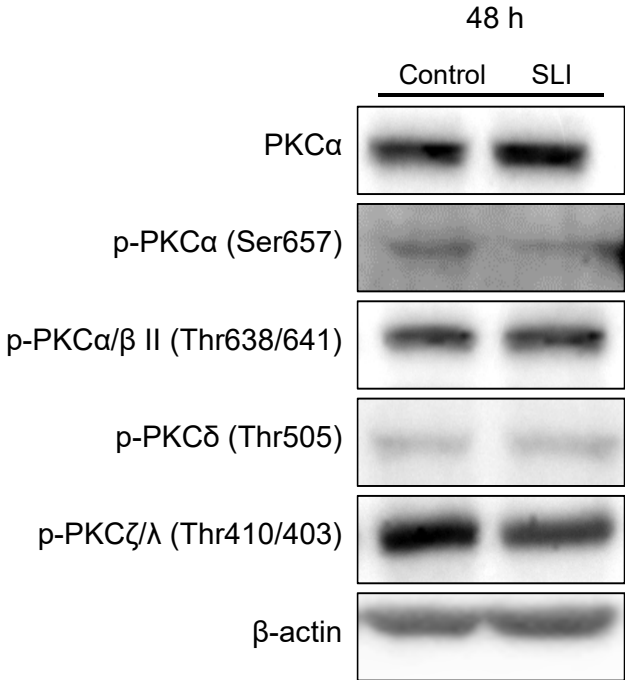

**Supplemental Figure S4. Inhibition of S1P lyase by SLI regulates PKC family activity.** HEK293 cells were treated with SLI. Lysates from the cells at 48 h. Phosphorylation of PKC isoforms were analyzed by western blot.  $\beta$ -actin was used as the control.
